# Supplementary material for: Template-free detection of macromolecular complexes in cryo electron tomograms
Source: PubMed Central journal article supplement — Bioinformatics. 2011 Jun 14;27(13):i69–76. doi: 10.1093/bioinformatics/btr207 (PMC3117359; doi:10.1093/bioinformatics/btr207), 2011-06-14
Supplement: supp_btr207_Xu_252_sup_1.pdf [file supp_btr207_Xu_252_sup_1.pdf]

# Supplementary Materials: Template-free detection of macromolecular complexes in cryo electron tomograms

Min Xu<sup>1</sup>, Martin Beck<sup>2</sup>, Frank Alber<sup>1\*</sup>

<sup>1</sup> Molecular and Computational Biology,  
University of Southern California, Los Angeles, CA 90089, USA.

<sup>2</sup> European Molecular Biology Laboratory,  
Meyerhofstr. 1, 69117 Heidelberg, Germany.

## 1 Classification performance on additional benchmark sets

Besides benchmark sets 1 and 2, we tested our method on additional 50 benchmark sets for which tomograms were reconstructed at SNR level 0.5 using the same parameters as in benchmark sets 1 and 2. Each tomogram contains 4 types of randomly chosen complexes with 10 instances for each type randomly oriented and located, generated in the same way as in benchmark sets 1 and 2. The GHMRF classification performance for all sets is listed in Table 1.

Table 1: Classification performance

| Tomogram id | Protein complexes        | Voxel based |        | Object based |        |
|-------------|--------------------------|-------------|--------|--------------|--------|
|             |                          | Precision   | Recall | Precision    | Recall |
| 1           | 3K7A 2REC 2BO9 2H12      | 0.48        | 0.52   | 0.62         | 0.62   |
| 2           | 2REC 1W6T 1QO1 1DPB      | 0.33        | 0.39   | 0.53         | 0.53   |
| 3           | 2GLS 1VRG 2AW7_2AWB 1F1B | 0.55        | 0.59   | 0.70         | 0.70   |
| 4           | 2GHO 1EQR 1VRG 1AON      | 0.43        | 0.49   | 0.62         | 0.62   |
| 5           | 2REC 1QO1 3K7A 2IDB      | 0.67        | 0.72   | 0.90         | 0.88   |
| 6           | 3K7A 1W6T 1F1B 2GHO      | 0.48        | 0.52   | 0.50         | 0.50   |
| 7           | 1VPX 1GYT 2AW7_2AWB 3GPT | 0.72        | 0.77   | 0.85         | 0.85   |
| 8           | 1QO1 1VRG 2GHO 1W6T      | 0.25        | 0.34   | 0.62         | 0.62   |
| 9           | 2AW7_2AWB 2GLS 2REC 1DPB | 0.46        | 0.56   | 0.72         | 0.72   |
| 10          | 2REC 3GPT 2GLS 1QO1      | 0.44        | 0.48   | 0.47         | 0.47   |
| 11          | 2H12 1DPB 2BYU 1EQR      | 0.45        | 0.51   | 0.65         | 0.65   |
| 12          | 1F1B 1DPB 1W6T 1A1S      | 0.56        | 0.62   | 0.76         | 0.78   |
| 13          | 1VPX 3K7A 1EQR 2AW7_2AWB | 0.45        | 0.50   | 0.53         | 0.53   |
| 14          | 1YG6 2AW7_2AWB 1A1S 2GLS | 0.44        | 0.49   | 0.60         | 0.60   |
| 15          | 1A1S 1QO1 2IDB 1W6T      | 0.41        | 0.44   | 0.35         | 0.35   |
| 16          | 1A1S 3K7A 2REC 2IDB      | 0.45        | 0.50   | 0.55         | 0.55   |
| 17          | 3K7A 1QO1 2AW7_2AWB 1F1B | 0.27        | 0.30   | 0.39         | 0.40   |
| 18          | 2AW7_2AWB 1A1S 1DPB 2H12 | 0.67        | 0.71   | 0.80         | 0.80   |
| 19          | 1BXR 1F1B 2GLS 1VRG      | 0.59        | 0.67   | 0.68         | 0.68   |
| 20          | 2AW7_2AWB 2GHO 2IDB 2BO9 | 0.40        | 0.44   | 0.57         | 0.57   |
| 21          | 3K7A 1VPX 2REC 1DPB      | 0.27        | 0.31   | 0.39         | 0.40   |
| 22          | 1BXR 2REC 1GYT 2GHO      | 0.45        | 0.51   | 0.72         | 0.72   |
| 23          | 1AON 1YG6 2GHO 2GLS      | 0.30        | 0.32   | 0.49         | 0.50   |
| 24          | 1DPB 3GPT 1BXR 1VPX      | 0.46        | 0.50   | 0.55         | 0.55   |
| 25          | 1VRG 1KP8 2AW7_2AWB 1GYT | 0.48        | 0.50   | 0.57         | 0.57   |
| 26          | 3K7A 1DPB 1A1S 2GHO      | 0.17        | 0.29   | 0.57         | 0.57   |

\*Corresponding author

|    |                          |      |      |      |      |
|----|--------------------------|------|------|------|------|
| 27 | 1KP8 3GPT 1YG6 1VPX      | 0.63 | 0.68 | 0.78 | 0.78 |
| 28 | 1A1S 2BYU 3GPT 2REC      | 0.38 | 0.40 | 0.40 | 0.40 |
| 29 | 1AON 1A1S 2GHO 2GLS      | 0.52 | 0.57 | 0.62 | 0.62 |
| 30 | 3K7A 2GHO 1VPX 2AW7_2AWB | 0.36 | 0.39 | 0.50 | 0.50 |
| 31 | 2GLS 1DPB 2BYU 1A1S      | 0.40 | 0.44 | 0.50 | 0.50 |
| 32 | 1VRG 1DPB 1KP8 2GHO      | 0.40 | 0.48 | 0.65 | 0.65 |
| 33 | 1F1B 1VPX 2H12 1EQR      | 0.69 | 0.74 | 0.88 | 0.88 |
| 34 | 1GYT 1QO1 1KP8 2IDB      | 0.28 | 0.37 | 0.55 | 0.55 |
| 35 | 1VPX 1EQR 1GYT 2AW7_2AWB | 0.47 | 0.54 | 0.68 | 0.68 |
| 36 | 1BXR 1QO1 2H12 2BYU      | 0.37 | 0.41 | 0.50 | 0.50 |
| 37 | 1A1S 1QO1 2IDB 1DPB      | 0.39 | 0.47 | 0.70 | 0.70 |
| 38 | 1VRG 1AON 2GHO 2BO9      | 0.44 | 0.51 | 0.50 | 0.50 |
| 39 | 2GHO 1VPX 1QO1 2IDB      | 0.50 | 0.56 | 0.70 | 0.70 |
| 40 | 2IDB 1AON 1EQR 2GLS      | 0.41 | 0.46 | 0.65 | 0.65 |
| 41 | 1YG6 2BO9 1DPB 1VRG      | 0.63 | 0.73 | 0.97 | 0.97 |
| 42 | 2IDB 3GPT 1GYT 1A1S      | 0.50 | 0.53 | 0.53 | 0.53 |
| 43 | 2H12 1DPB 1W6T 1A1S      | 0.55 | 0.65 | 0.85 | 0.82 |
| 44 | 3K7A 1F1B 1AON 1VRG      | 0.34 | 0.36 | 0.50 | 0.50 |
| 45 | 2AW7_2AWB 1VRG 1W6T 1VPX | 0.35 | 0.42 | 0.46 | 0.45 |
| 46 | 2GLS 2H12 1QO1 1W6T      | 0.55 | 0.57 | 0.75 | 0.75 |
| 47 | 1BXR 3K7A 1VPX 1A1S      | 0.50 | 0.54 | 0.60 | 0.60 |
| 48 | 3GPT 2REC 1YG6 1A1S      | 0.52 | 0.60 | 0.78 | 0.80 |
| 49 | 2REC 2AW7_2AWB 3K7A 1GYT | 0.42 | 0.45 | 0.45 | 0.45 |
| 50 | 1EQR 1QO1 2H12 1A1S      | 0.49 | 0.52 | 0.62 | 0.62 |
